# Supplementary material for: De Novo Long-Read Whole-Genome Assemblies and the Comparative Pan-Genome Analysis of Ascochyta Blight Pathogens Affecting Field Pea
Source: MDPI journal article supplement (doi:10.3390/jof8080884), 2022-08-22
Supplement: s1 [file s1]

Supplementary Materials

# De Novo Long-Read Whole-Genome Assemblies and the Comparative Pan-Genome Analysis of Ascochyta Blight Pathogens Affecting Field Pea

Supplementary Table S1. AB species and origin.

| Samples        | S/N | ID         | Year | Host     | Variety | State | Site                 | Species |
|----------------|-----|------------|------|----------|---------|-------|----------------------|---------|
| Isolate1Pk     | 1   | GRP-15-464 | 2015 | FieldPea | Kaspa   | WA    | GrassPatch           | Pk      |
| Isolate2Pk     | 2   | PIN-15-415 | 2015 | FieldPea | Oura    | WA    | Pingrup              | Pk      |
| Isolate3Pp     | 3   | GRP-11-30  | 2011 | FieldPea | Kaspa   | WA    | GrassPatch           | Pp      |
| Isolate4Pp     | 4   | RIV-11-185 | 2011 | FieldPea | Kaspa   | SA    | RivertonNVT          | Pp      |
| Isolate5Pp     | 5   | YEL-11-87  | 2011 | FieldPea | Kaspa   | SA    | Yeelanna             | Pp      |
| Isolate18Ppll  | 18  | STH-17-057 | 2017 | FieldPea | Gunyah  | WA    | Scaddan              | Ppll    |
| Isolate22Pk    | 22  | BAL-14-264 | 2014 | FieldPea | Kaspa   | SA    | BalaklavaPeaBreeding | Pk      |
| Isolate27Ppll  | 27  | SCD-17-092 | 2017 | FieldPea | Wharton | WA    | Scaddan              | Ppll    |
| Isolate32Pk    | 32  | GRP-17-199 | 2017 | FieldPea | Oura    | WA    | GrassPatch           | Pk      |
| Isolate36Pk    | 36  | KIN-16-703 | 2016 | FieldPea | Oura    | SA    | Kingsford            | Pk      |
| Isolate42Pk    | 42  | RBW-11-154 | 2011 | FieldPea | Kaspa   | VIC   | Rainbow              | Pk      |
| Isolate58Ppll  | 58  | GRP-17-128 | 2017 | FieldPea | Pearl   | WA    | GrassPatch           | Ppll    |
| Isolate72Ppll  | 72  | KIN-16-675 | 2016 | FieldPea | Kaspa   | SA    | Kingsford            | Ppll    |
| Isolate87Pp    | 87  | SLK-17-353 | 2017 | FieldPea | Pearl   | VIC   | SeaLake              | Pp      |
| Isolate88Pp    | 88  | GRP-17-127 | 2017 | FieldPea | Pearl   | WA    | GrassPatch           | Pp      |
| Isolate97Pp    | 97  | BRC-11-24  | 2011 | FieldPea | Kaspa   | NSW   | BoreeCreek           | Pp      |
| Isolate104Ppll | 104 | KAD-14-285 | 2014 | FieldPea | Oura    | SA    | KadinaPeaBreeding    | Ppll    |
| Isolate113Ppll | 113 | STH-17-065 | 2017 | FieldPea | Gunyah  | WA    | South Perth          | Ppll    |

Supplementary Table S2. Genome sequencing statistics. Table shows raw data generated from sequencing; total read length and coverage for AB isolates.

| Isolates       | Before pre-processing  |              | After pre-processing   |              |
|----------------|------------------------|--------------|------------------------|--------------|
|                | Total read length (bp) | Coverage (X) | Total read length (bp) | Coverage (X) |
| Isolate1Pk     | 4,982,226,679          | 89.2         | 3,704,623,294          | 66.33        |
| Isolate2Pk     | 11,326,058,792         | 200.6        | 8,589,291,761          | 152.14       |
| Isolate22Pk    | 2,975,195,303          | 50.7         | 2,060,794,720          | 35.14        |
| Isolate32Pk    | 2,308,893,989          | 40.2         | 1,855,560,480          | 32.27        |
| Isolate36Pk    | 3,846,008,904          | 68.6         | 3,109,580,221          | 55.46        |
| Isolate42Pk    | 3,088,636,394          | 49.6         | 2,340,065,964          | 37.56        |
| Isolate18Ppll  | 15,521,077,219         | 339.9        | 9,000,006,072          | 197.12       |
| Isolate27Ppll  | 4,149,147,116          | 96.8         | 2,912,451,502          | 67.97        |
| Isolate58Ppll  | 3,710,521,802          | 97.8         | 3,165,593,401          | 83.47        |
| Isolate72Ppll  | 6,781,331,088          | 195.6        | 5,467,406,519          | 157.71       |
| Isolate104Ppll | 4,426,153,959          | 120.5        | 3,049,702,068          | 83.02        |
| Isolate113Ppll | 5,014,024,569          | 129.3        | 3,251,706,558          | 83.82        |
| Isolate3Pp     | 6,200,516,350          | 179.0        | 3,275,416,034          | 94.55        |
| Isolate4Pp     | 5,256,135,966          | 151.0        | 2,836,519,143          | 81.49        |
| Isolate5Pp     | 3,055,700,906          | 83.4         | 1,853,438,494          | 50.57        |

|             |               |       |               |        |
|-------------|---------------|-------|---------------|--------|
| Isolate87Pp | 4,472,157,092 | 129.6 | 3,308,303,728 | 95.88  |
| Isolate88Pp | 6,845,192,045 | 198.7 | 4,619,910,882 | 134.07 |
| Isolate97Pp | 4,591,051,084 | 113.7 | 2,771,022,159 | 68.62  |

Supplementary Table S3. Transcriptome sequencing statistics for AB.

| Isolates<br>Species | Total reads be-<br>fore filtering | Total bases before<br>filtering (Gb) | Total reads after<br>filtering (Mil-<br>lion) | Total bases af-<br>ter filtering<br>(Gb) | Q20 bases<br>(%) | GC content |
|---------------------|-----------------------------------|--------------------------------------|-----------------------------------------------|------------------------------------------|------------------|------------|
| Isolate1Pk          | 50,081,320                        | 7.56                                 | 48.5                                          | 6.95                                     | 93.8             | 55.1       |
| Isolate2Pk          | 17,545,006                        | 2.65                                 | 16.9                                          | 2.42                                     | 93.8             | 54.8       |
| Isolate22Pk         | 23,093,894                        | 3.49                                 | 22.1                                          | 3.14                                     | 93.6             | 54.8       |
| Isolate32Pk         | 29,174,602                        | 4.41                                 | 27.7                                          | 4.0                                      | 93.5             | 54.4       |
| Isolate36Pk         | 13,643,562                        | 2.06                                 | 12.9                                          | 1.84                                     | 95.0             | 56.1       |
| Isolate42Pk         | 6,943,954                         | 1.05                                 | 6.4                                           | 0.87                                     | 93.2             | 56.0       |
| Isolate18Ppll       | 18,906,428                        | 2.85                                 | 18.3                                          | 2.63                                     | 93.9             | 55.5       |
| Isolate27Ppll       | 31,838,402                        | 4.81                                 | 30.8                                          | 4.40                                     | 94.0             | 55.5       |
| Isolate58Ppll       | 24,567,250                        | 3.71                                 | 23.2                                          | 3.31                                     | 93.2             | 54.1       |
| Isolate72Ppll       | 17,874,650                        | 2.70                                 | 17.1                                          | 2.47                                     | 93.6             | 55.7       |
| Isolate104Ppll      | 34,672,678                        | 5.24                                 | 33.6                                          | 4.78                                     | 93.9             | 54.9       |
| Isolate113Ppll      | 30,442,572                        | 4.60                                 | 29.4                                          | 4.19                                     | 93.8             | 55.6       |
| Isolate3Pp          | 29,773,668                        | 4.50                                 | 28.9                                          | 4.1                                      | 93.9             | 54.9       |
| Isolate4Pp          | 29,047,142                        | 4.39                                 | 28.0                                          | 4.02                                     | 93.6             | 55.3       |
| Isolate5Pp          | 32,182,830                        | 4.86                                 | 30.9                                          | 4.37                                     | 93.6             | 55.5       |
| Isolate87Pp         | 28,950,658                        | 4.37                                 | 27.9                                          | 4.05                                     | 93.6             | 55.5       |
| Isolate88Pp         | 34,578,504                        | 5.22                                 | 33.2                                          | 4.78                                     | 93.8             | 55.3       |
| Isolate97Pp         | 27,744,170                        | 4.19                                 | 26.6                                          | 3.82                                     | 93.7             | 54.1       |

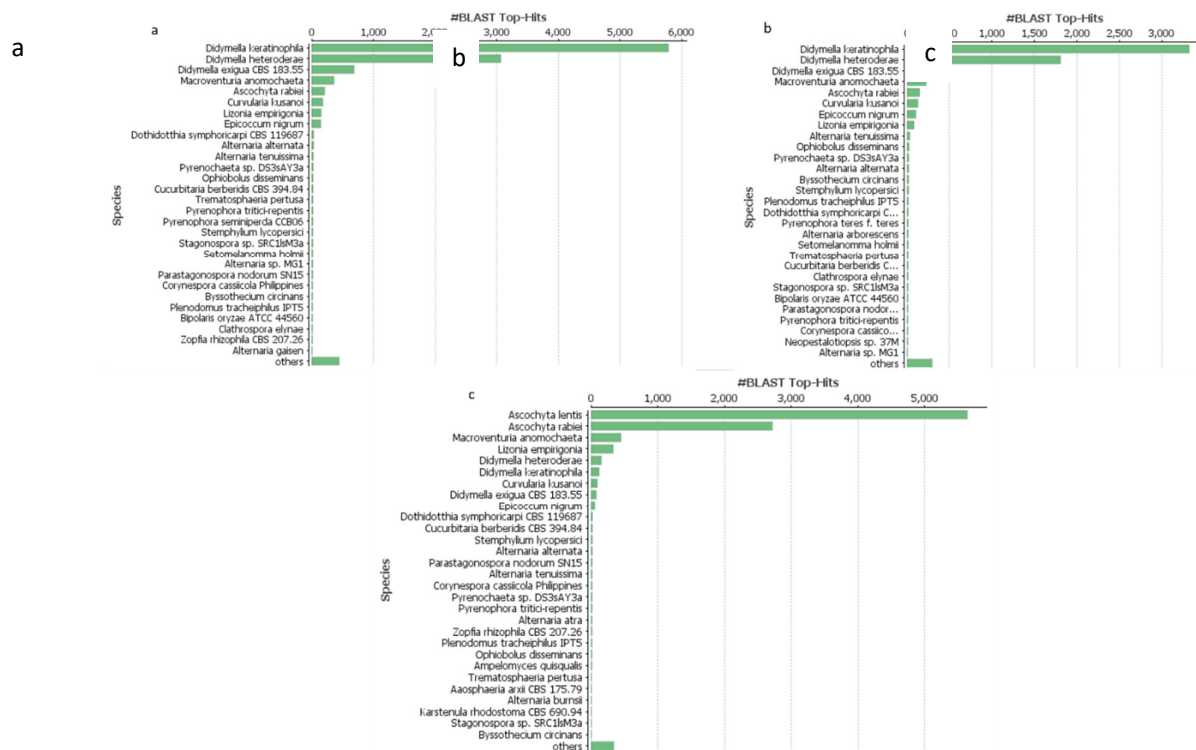

**Supplementary Figure S1.** Blast2go top-hit species distribution for AB reference isolates **a:** *P. pinodella*, **b:** *P. pinodella* and **c:** *P. koolunga*.

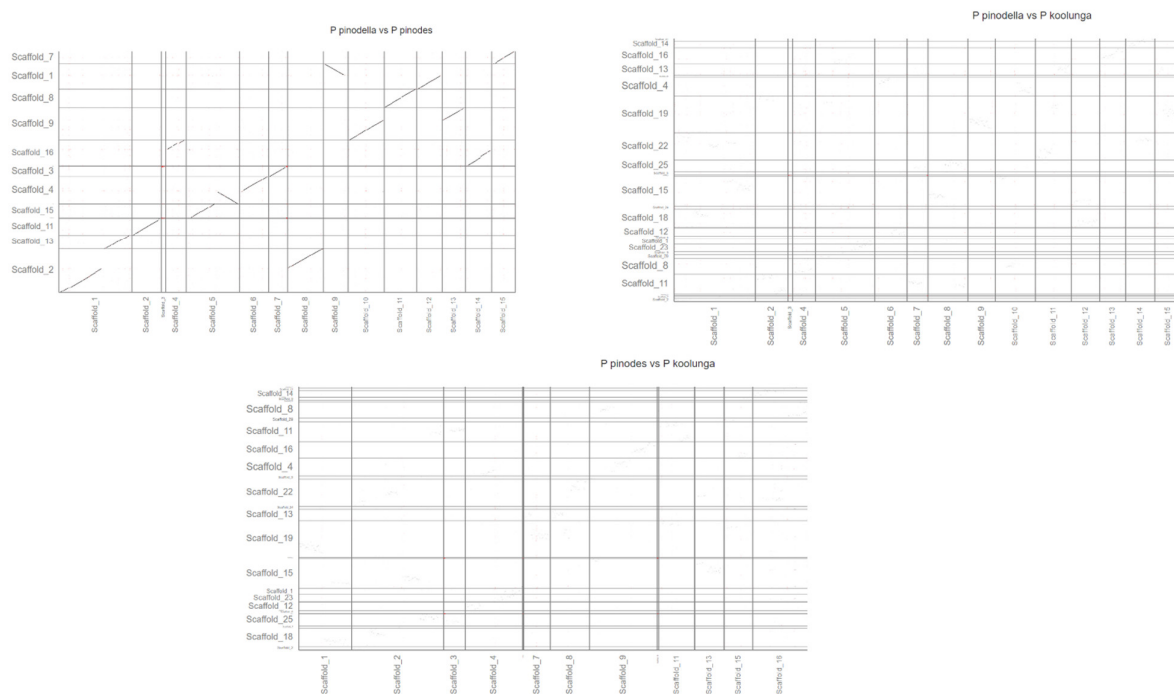

**Supplementary Figure S2.** Dot plot comparing intraspecies AB genome assemblies aligned to its reference genomes (top 3 rows) and between the AB species (bottom).

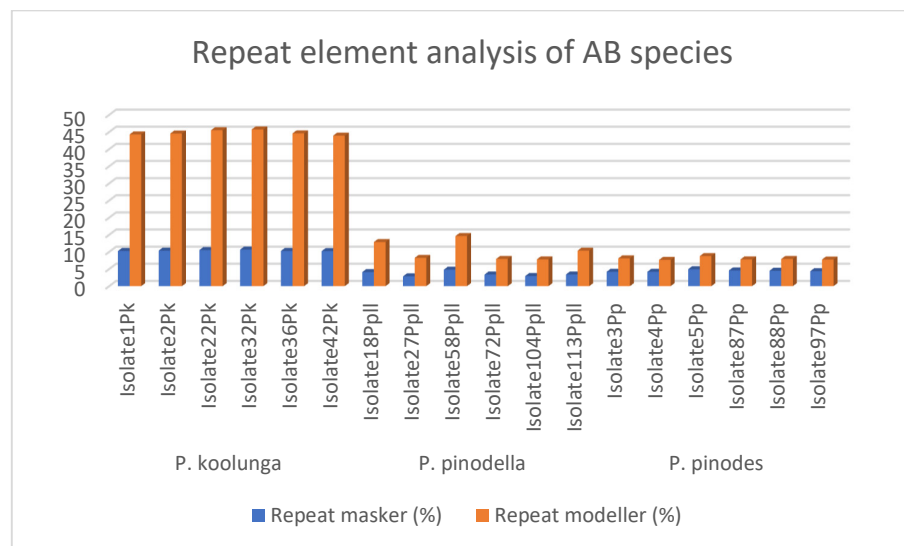

**Supplementary Figure S3.** Repeat analysis for AB species.

**Supplementary Table S4.** Top ten repeat elements in AB species (RepeatMasker).

| <i>P. koolunga</i> | <i>P. pinodella</i> | <i>P. pinodes</i> |
|--------------------|---------------------|-------------------|
| Simple repeats     | Simple repeats      | Simple repeats    |
| Gypsy              | Gypsy               | Gypsy             |
| AFUT1              | MOLLY               | Mariner           |
| LMR1               | Mariner             | MOLLY             |
| MOLLY              | LMR1                | 5SrRNA            |
| COPIA              | COPIA               | MarCry            |
| Mariner            | 5SrRNA              | Tad1              |
| PYGGY              | PYGGY               | COPIA             |
| REALAA             | MarCry              | LMR1              |
| TCN-1              | Tad1                | I-1               |

**Supplementary Table S5.** Mating type determination for AB species: *A. lentis* MAT1-1 (DQ341314.1) and MAT1-2 (DQ341315.2) as well as *P. pinodella* MAT1-1 (JF815529.1) and MAT1-2 (JF815531.1) genes were blasted against the assembled AB genomes. *P. pinodes* and *P. pinodella* had no hits for *A. lentis* MAT1-1 and MAT1-2 but hits for *P. pinodella* MAT1-1 and MAT1-2 genes. *P. koolunga* had no hits for *P. pinodella* MAT1-1 and MAT1-2 but hits for *A. lentis* MAT1-1 and MAT1-2 genes.

| Isolates/Species | <i>A. lentis</i><br>MAT1-1 | <i>A. lentis</i><br>MAT1-2 | <i>P. pinodella</i><br>MAT1-1 | <i>P. pinodella</i><br>MAT1-2 | Mating gene | Mating pattern                |
|------------------|----------------------------|----------------------------|-------------------------------|-------------------------------|-------------|-------------------------------|
| Isolate1Pk       |                            | ü                          |                               |                               | MAT1-2      | self-sterile (hetero-thallic) |
| Isolate2Pk       |                            | ü                          |                               |                               | MAT1-2      | self-sterile (hetero-thallic) |
| Isolate22Pk      | ü                          |                            |                               |                               | MAT1-1      | self-sterile (hetero-thallic) |
| Isolate32Pk      | ü                          |                            |                               |                               | MAT1-1      | self-sterile (hetero-thallic) |
| Isolate36Pk      | ü                          |                            |                               |                               | MAT1-1      | self-sterile (hetero-thallic) |
| Isolate42Pk      |                            | ü                          |                               |                               | MAT1-2      | self-sterile (hetero-thallic) |

|                |   |   |        |                               |
|----------------|---|---|--------|-------------------------------|
| Isolate18Ppll  | ü |   | MAT1-1 | self-sterile (hetero-thallic) |
| Isolate27Ppll  |   | ü | MAT1-2 | self-sterile (hetero-thallic) |
| Isolate58Ppll  | ü |   | MAT1-1 | self-sterile (hetero-thallic) |
| Isolate72Ppll  |   | ü | MAT1-2 | self-sterile (hetero-thallic) |
| Isolate104Ppll | ü |   | MAT1-1 | self-sterile (hetero-thallic) |
| Isolate113Ppll | ü |   | MAT1-1 | self-sterile (hetero-thallic) |
| Isolate3Pp     | ü | ü | Both   | self-fertile (homo-thallic)   |
| Isolate4Pp     | ü | ü | Both   | self-fertile (homo-thallic)   |
| Isolate5Pp     | ü | ü | Both   | self-fertile (homo-thallic)   |
| Isolate87Pp    | ü | ü | Both   | self-fertile (homo-thallic)   |
| Isolate88Pp    | ü | ü | Both   | self-fertile (homo-thallic)   |
| Isolate97Pp    | ü | ü | Both   | self-fertile (homo-thallic)   |

**Supplementary Table S6.** Numbers of core, variable, and unique genes in the three AB species using the reference isolates; Isolate2Pk, Isolate3Pp, Isolate18Ppll.

|          | <i>P. koolunga</i> |             | <i>P. pinodella</i> |             | <i>P. pinodes</i> |             |
|----------|--------------------|-------------|---------------------|-------------|-------------------|-------------|
|          | Orthovenn2         | OrthoFinder | Orthovenn2          | OrthoFinder | Orthovenn2        | OrthoFinder |
| Core     | 8,721              | 8,479       | 9,916               | 9,781       | 9,757             | 9,625       |
| Variable | 1,607              | 1,601       | 1,835               | 1,951       | 1,867             | 1,594       |
| Unique   | 5                  | 3           | 47                  | 62          | 50                | 43          |
| Total    | 10,333             | 10,083      | 11,798              | 11,794      | 11,674            | 11,262      |

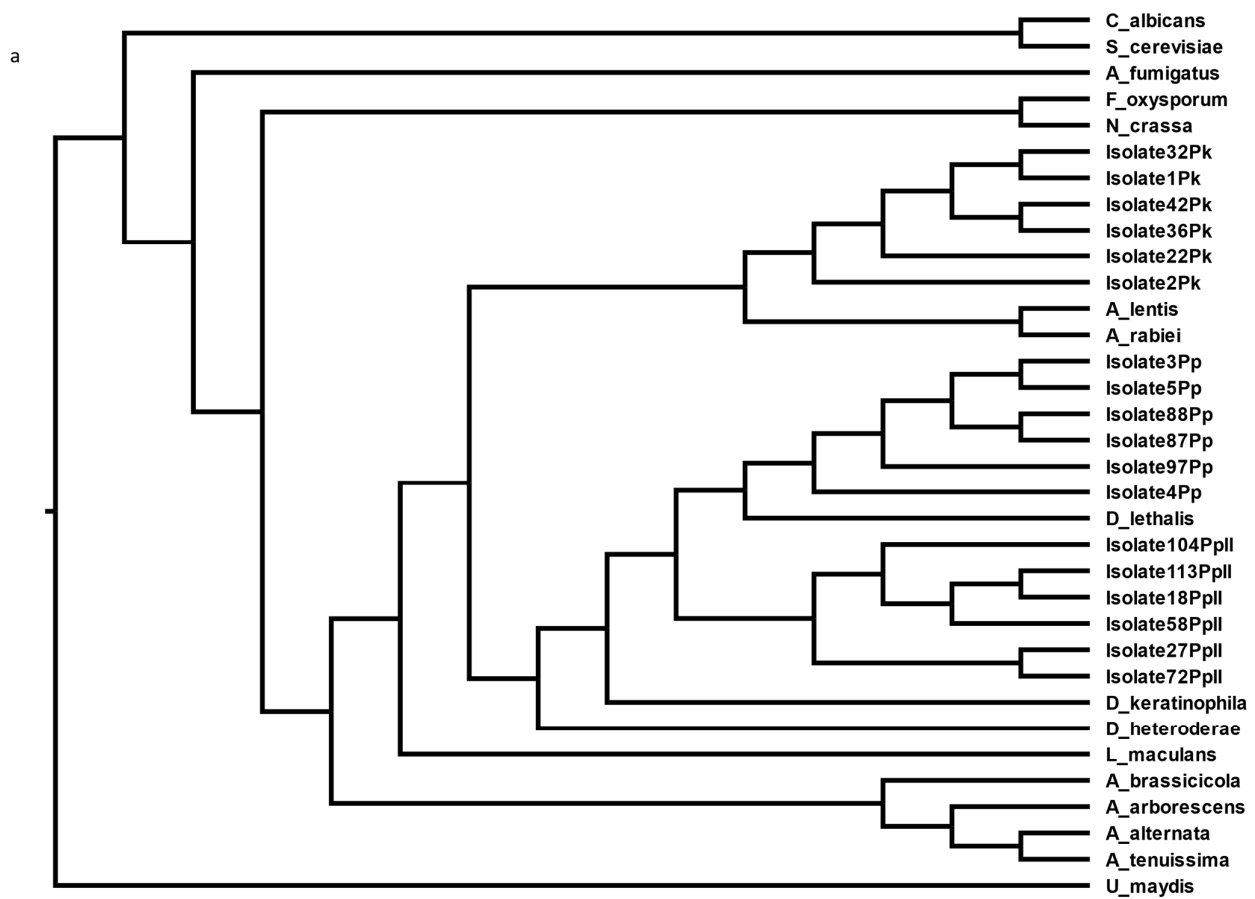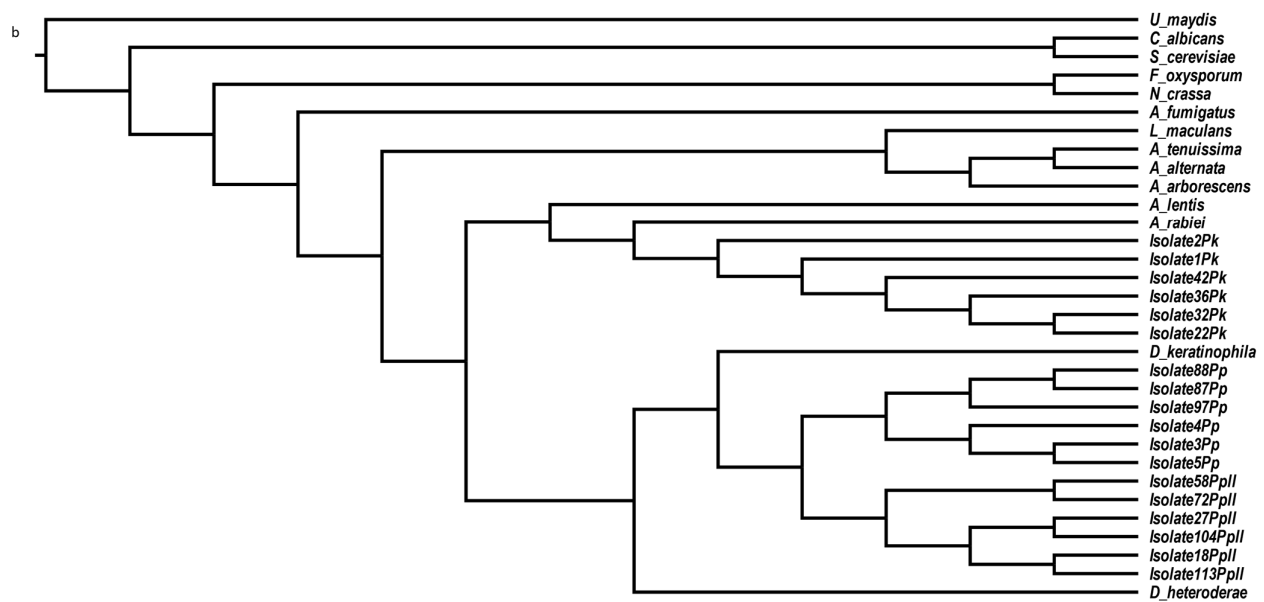

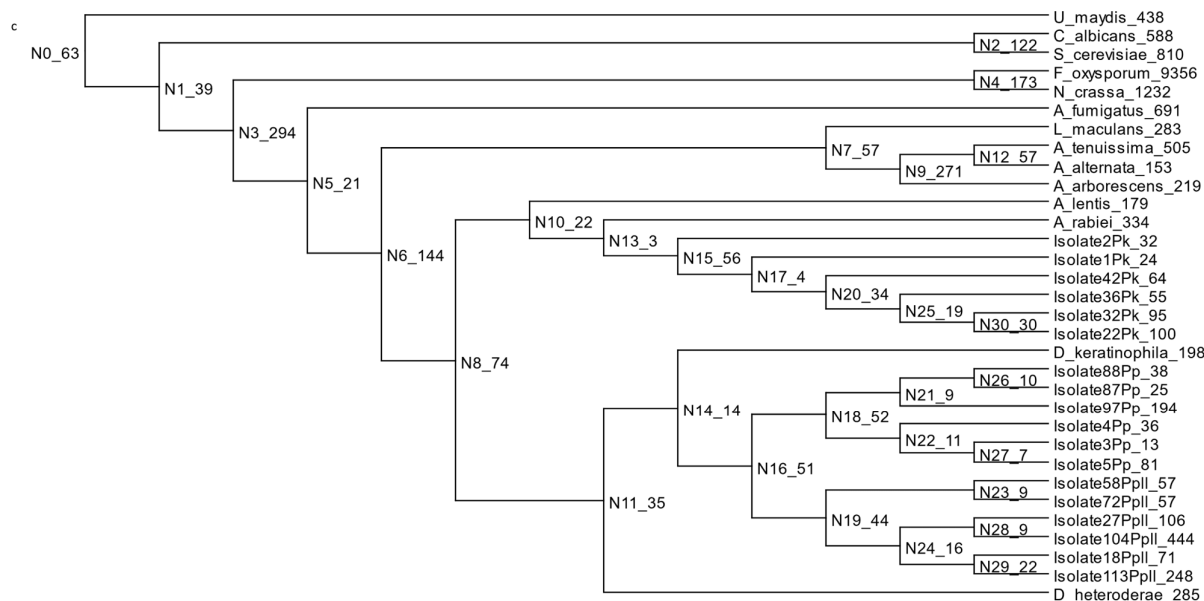

**Supplementary Figure S4.** Whole genome and ortholog phylogeny of AB species (a,b); NJ dendrogram using Nei's pairwise genetic distance calculation; Ortholog phylogeny of AB species showing gene duplication events (c).

**Supplementary Table S7.** CAZyme profile of AB species.

|                     |                | GH  | GT | PL | CE | AA  | CBM | Total |
|---------------------|----------------|-----|----|----|----|-----|-----|-------|
| <i>P. koolunga</i>  | Isolate1Pk     | 239 | 76 | 32 | 32 | 71  | 15  | 465   |
|                     | Isolate2Pk     | 242 | 76 | 32 | 32 | 72  | 16  | 470   |
|                     | Isolate32Pk    | 238 | 75 | 31 | 30 | 70  | 14  | 458   |
|                     | Isolate22Pk    | 241 | 75 | 31 | 30 | 69  | 14  | 460   |
|                     | Isolate36Pk    | 236 | 76 | 33 | 31 | 69  | 16  | 461   |
|                     | Isolate42Pk    | 235 | 71 | 33 | 30 | 74  | 14  | 457   |
| <i>P. pinodes</i>   | Isolate3Pp     | 267 | 78 | 31 | 32 | 82  | 20  | 510   |
|                     | Isolate4Pp     | 266 | 73 | 30 | 35 | 83  | 17  | 504   |
|                     | Isolate5Pp     | 270 | 80 | 30 | 33 | 84  | 21  | 518   |
|                     | Isolate87Pp    | 259 | 73 | 30 | 33 | 82  | 17  | 494   |
|                     | Isolate88Pp    | 256 | 76 | 30 | 32 | 80  | 18  | 492   |
|                     | Isolate97Pp    | 271 | 74 | 34 | 34 | 91  | 15  | 519   |
| <i>P. pinodella</i> | Isolate18PpII  | 279 | 84 | 31 | 38 | 88  | 18  | 538   |
|                     | Isolate27PpII  | 269 | 79 | 32 | 36 | 85  | 17  | 518   |
|                     | Isolate58PpII  | 274 | 82 | 32 | 34 | 83  | 19  | 524   |
|                     | Isolate72PpII  | 272 | 81 | 31 | 34 | 79  | 18  | 515   |
|                     | Isolate104PpII | 306 | 86 | 35 | 39 | 101 | 20  | 587   |
|                     | Isolate113PpII | 294 | 81 | 32 | 40 | 89  | 20  | 556   |

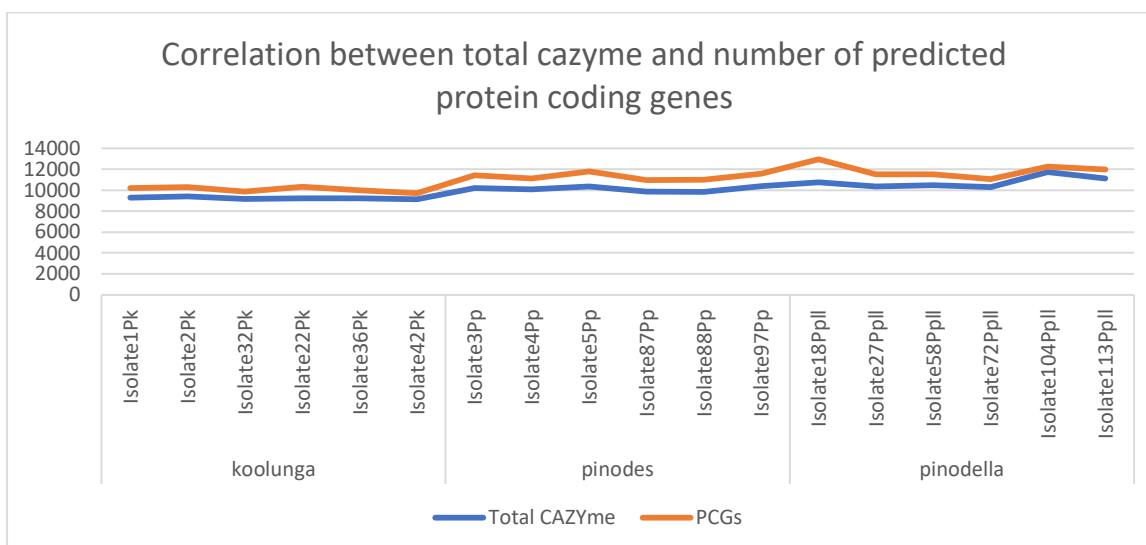

**Supplementary Figure S5.** AB CAZyme analysis. **a:** Correlation between the total number of CAZymes and PCGs predicted in the genomes of AB isolates. Total number of CAZymes for each isolate was multiplied by 20 to get the numbers close enough to align the trend line with that of the number of PCG's in each isolate. **b:** CAZyme analysis of Ascomycota species.

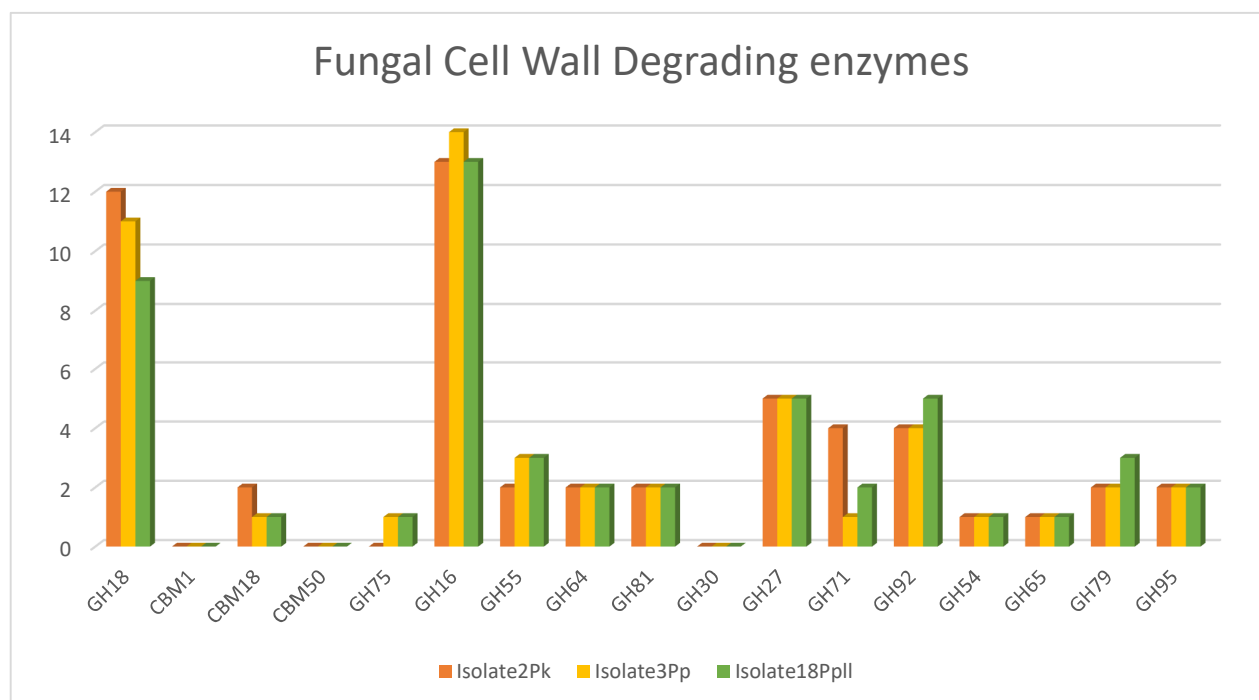

**Supplementary Figure S6.** Fungal cell wall degrading CAZyme analysis.



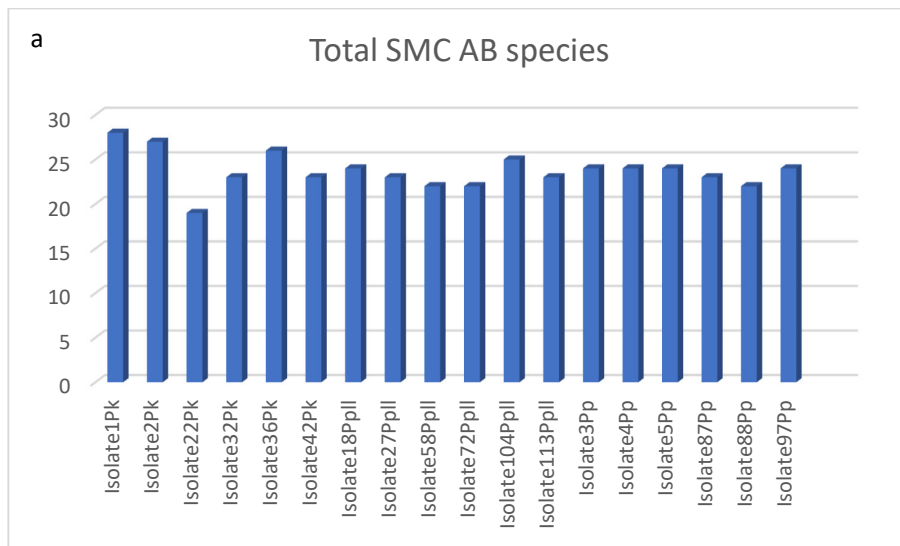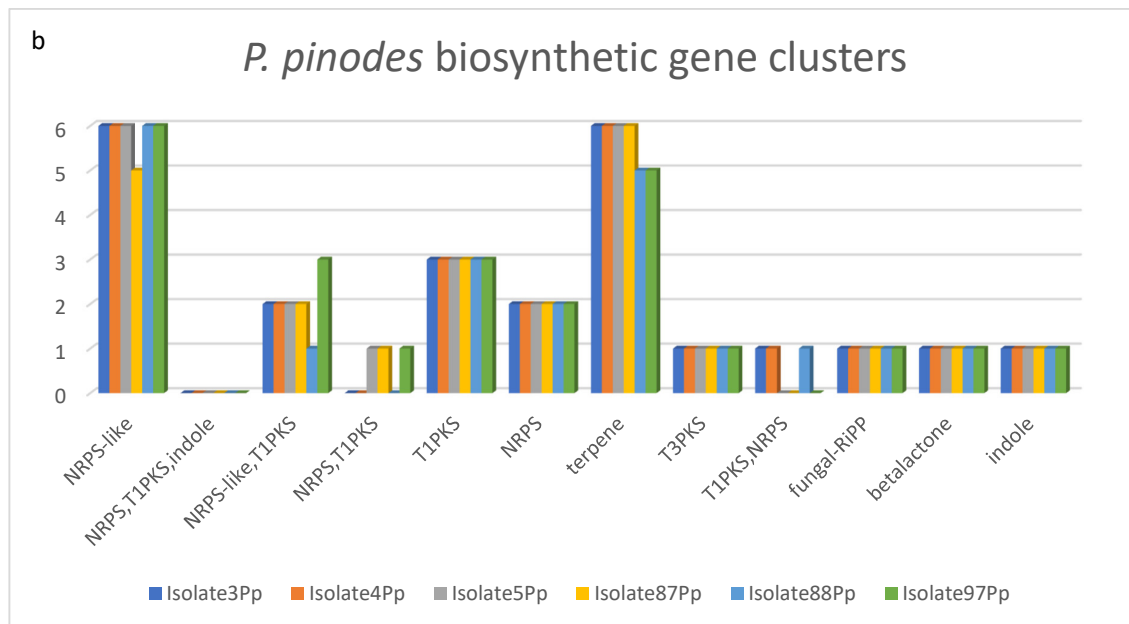

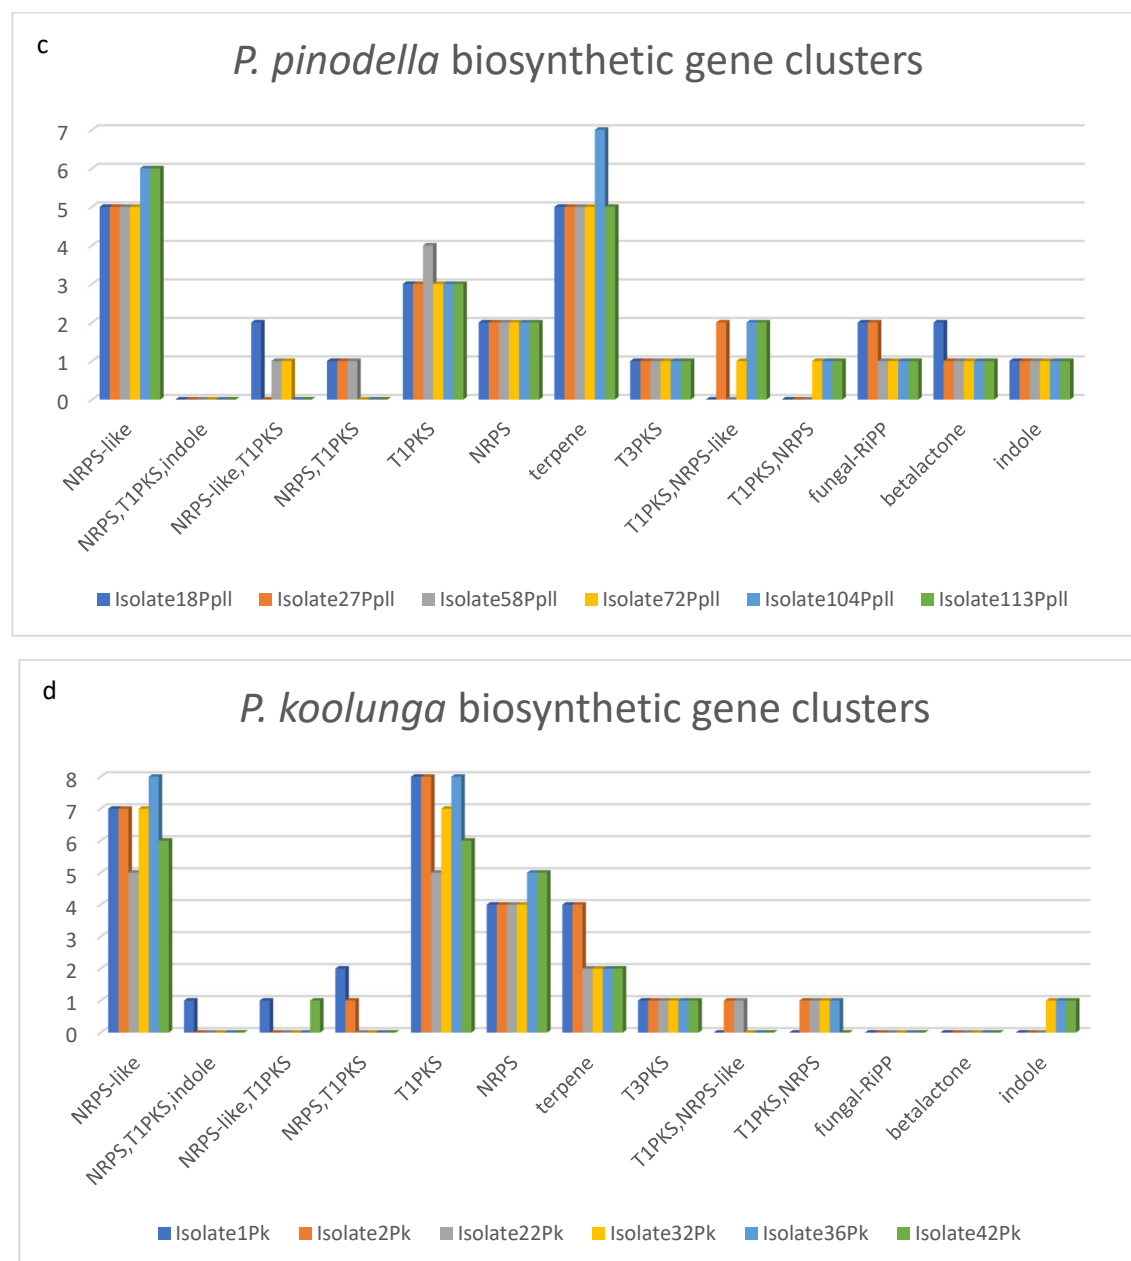

**Supplementary Figure S7.** Biosynthetic gene cluster (BCG) analysis of AB isolates. **a:** Total number of BCG across all AB isolates. **b, c** and **d:** BCG profile for each AB species.

**Supplementary Table S8.** Mitochondrial genome annotation of AB isolates using MITOS2. Pk- *P. koolunga*, pll- *P. pinodella*, pp- *P. pinodes*.

| Isolates<br>Genes | 1Pk | 2Pk | 22Pk | 32<br>Pk | 36<br>Pk | 42<br>Pk | 18Ppll | 27Ppll | 58Ppll | 72Ppll | 104Ppll | 113<br>Ppll | 3Pp | 4Pp | 5Pp | 87Pp | 88Pp | 97Pp |
|-------------------|-----|-----|------|----------|----------|----------|--------|--------|--------|--------|---------|-------------|-----|-----|-----|------|------|------|
| cox1              | 8   | 10  | 8    | 10       | 7        | 7        | 10     | 6      | 6      | 10     | 7       | 7           | 7   | 8   | 12  | 7    | 8    | 7    |
| cox2              | 3   | 7   | 6    | 7        | 6        | 4        | 4      | 2      | 3      | 3      | 4       | 2           | 3   | 4   | 3   | 3    | 2    | 2    |
| cox3              | 4   | 5   | 4    | 4        | 4        | 3        | 4      | 4      | 4      | 6      | 5       | 5           | 4   | 6   | 5   | 4    | 6    | 4    |
| cob               | 4   | 4   | 5    | 4        | 4        | 4        | 3      | 3      | 5      | 4      | 4       | 5           | 4   | 4   | 5   | 5    | 4    | 5    |
| nad1              | 6   | 5   | 5    | 5        | 5        | 6        | 4      | 4      | 4      | 5      | 3       | 4           | 4   | 3   | 2   | 4    | 4    | 2    |
| nad2              | 7   | 5   | 6    | 6        | 5        | 5        | 7      | 5      | 5      | 5      | 4       | 5           | 7   | 5   | 7   | 4    | 4    | 6    |

|       |    |    |    |    |    |    |    |    |    |    |    |    |    |    |    |    |    |    |
|-------|----|----|----|----|----|----|----|----|----|----|----|----|----|----|----|----|----|----|
| nad3  | 3  | 2  | 3  | 3  | 4  | 3  | 4  | 4  | 3  | 5  | 2  | 4  | 8  | 7  | 8  | 7  | 6  | 4  |
| nad4  | 3  | 4  | 4  | 3  | 2  | 3  | 6  | 3  | 3  | 3  | 3  | 4  | 3  | 5  | 5  | 4  | 3  | 3  |
| nad4L | 4  | 5  | 5  | 4  | 5  | 4  | 4  | 1  | 1  | 1  | 1  | 1  | 1  | 1  | 1  | 1  | 1  | 1  |
| nad5  | 5  | 4  | 3  | 4  | 3  | 4  | 11 | 9  | 10 | 11 | 8  | 10 | 13 | 12 | 12 | 11 | 12 | 11 |
| nad6  | 3  | 2  | 2  | 3  | 2  | 3  | 2  | 2  | 2  | 3  | 2  | 3  | 3  | 2  | 1  | 3  | 2  | 2  |
| rps5  | 1  | 0  | 1  | 0  | 0  | 2  | 0  | 0  | 0  | 0  | 0  | 1  | 0  | 1  | 1  | 0  | 0  | 0  |
| rps3  | 5  | 5  | 5  | 3  | 6  | 4  | 4  | 1  | 2  | 4  | 3  | 2  | 2  | 3  | 2  | 2  | 2  | 2  |
| rpo   | 2  | 1  | 1  | 1  | 1  | 1  | 0  | 0  | 0  | 0  | 0  | 0  | 0  | 0  | 0  | 0  | 0  | 0  |
| lagli | 39 | 41 | 35 | 34 | 39 | 34 | 16 | 15 | 13 | 18 | 11 | 12 | 25 | 20 | 18 | 13 | 14 | 17 |
| giy   | 15 | 16 | 17 | 15 | 18 | 12 | 11 | 7  | 6  | 16 | 4  | 6  | 13 | 19 | 17 | 10 | 12 | 12 |
| ATP6  | 1  | 2  | 1  | 2  | 2  | 2  | 3  | 1  | 1  | 3  | 1  | 1  | 2  | 2  | 2  | 1  | 2  | 1  |
| rrns  | 1  | 1  | 1  | 1  | 1  | 1  | 1  | 1  | 1  | 2  | 1  | 1  | 1  | 1  | 1  | 1  | 1  | 1  |
| rrnl  | 1  | 1  | 1  | 1  | 1  | 1  | 1  | 1  | 1  | 1  | 1  | 1  | 1  | 1  | 1  | 1  | 2  | 1  |

**Supplementary Table S9.** Mitochondrial annotation of AB isolates using RNAweasel. Pk- *P. koolunga*, pll- *P. pinodella*, pp- *P. pinodes*.

|                     | Isolates       | tRNAs with-<br>out introns | rnpB (mito +<br>plastid) | rnpB, derived<br>(mito + plastid) | Total number of<br>introns |
|---------------------|----------------|----------------------------|--------------------------|-----------------------------------|----------------------------|
| <i>P. koolunga</i>  | Isolate1Pk     | 27                         | 0                        | 0                                 | 46                         |
|                     | Isolate2Pk     | 25                         | 0                        | 0                                 | 45                         |
|                     | Isolate22Pk    | 27                         | 0                        | 0                                 | 47                         |
|                     | Isolate32Pk    | 27                         | 0                        | 0                                 | 47                         |
|                     | Isolate36Pk    | 27                         | 0                        | 0                                 | 47                         |
|                     | Isolate42Pk    | 27                         | 0                        | 0                                 | 47                         |
| <i>P. pinodella</i> | Isolate18Ppll  | 20                         | 0                        | 1                                 | 32                         |
|                     | Isolate27Ppll  | 24                         | 0                        | 1                                 | 37                         |
|                     | Isolate58Ppll  | 21                         | 0                        | 1                                 | 34                         |
|                     | Isolate72Ppll  | 25                         | 0                        | 1                                 | 38                         |
|                     | Isolate104Ppll | 25                         | 0                        | 1                                 | 37                         |
|                     | Isolate113Ppll | 23                         | 0                        | 1                                 | 36                         |
| <i>P. pinodes</i>   | Isolate3Pp     | 25                         | 1                        | 1                                 | 39                         |
|                     | Isolate4Pp     | 25                         | 1                        | 1                                 | 40                         |
|                     | Isolate5Pp     | 25                         | 1                        | 1                                 | 40                         |
|                     | Isolate87Pp    | 24                         | 1                        | 1                                 | 39                         |
|                     | Isolate88Pp    | 25                         | 1                        | 1                                 | 40                         |
|                     | Isolate97Pp    | 24                         | 1                        | 1                                 | 39                         |

**Supplementary Table S10.** Mitochondrial genome intron distribution within protein coding genes among AB species. t/s: potential trans-splicing.

|                    | cob         | cox1 | cox2 | cox3 | nad1 | nad2 | nad4L | nad5 |
|--------------------|-------------|------|------|------|------|------|-------|------|
| <i>P. koolunga</i> | Isolate1Pk  | 4    | 4    | 3    | 3    |      |       | 1    |
|                    | Isolate2Pk  | 4    | 6    | t/s  | 3    | t/s  | 1     | 1    |
|                    | Isolate22Pk | 4    | 8    | 1    | 3    |      |       | 1    |
|                    | Isolate32Pk | 4    | t/s  | 1    | 3    | t/s  |       | 1    |
|                    | Isolate36Pk | 2    | 8    | 1    | 3    |      |       | 1    |
|                    | Isolate42Pk | 4    | 6    | 2    | 3    |      |       | 1    |

|                     |                |     |     |   |   |   |     |
|---------------------|----------------|-----|-----|---|---|---|-----|
| <i>P. pinodella</i> | Isolate18Ppll  | 2   | 4   | 2 | 2 | 1 | 1   |
|                     | Isolate27Ppll  | 2   | 5   | 2 | 2 | 2 | t/s |
|                     | Isolate58Ppll  | 2   | 5   | 2 | 2 | 1 | 1   |
|                     | Isolate72Ppll  | 2   | 5   | 2 | 2 | 1 | 1   |
|                     | Isolate104Ppll | 2   | 5   | 2 | 2 | 1 | 1   |
|                     | Isolate113Ppll | 2   | 5   | 2 | 2 | 2 | 1   |
| <i>P. pinodes</i>   | Isolate3Pp     | 3   | t/s | 2 | 2 | 1 | 2   |
|                     | Isolate4Pp     | 3   | t/s | 2 | 2 | 1 | 2   |
|                     | Isolate5Pp     | t/s | 5   | 2 | 2 | 1 | 2   |
|                     | Isolate87Pp    | t/s | 5   | 2 | 2 | 1 | 2   |
|                     | Isolate88Pp    | 3   | 5   | 2 | 2 | 1 | 2   |
|                     | Isolate97Pp    | 3   | 5   | 2 | 2 | 1 | 2   |

Supplementary Table S11. Mitochondrial genome codon usage in AB species.

| Amino Acid | Codon | P. koolunga | P. pinodella | P. pinodes |
|------------|-------|-------------|--------------|------------|
| Ala        | GCG   | 40          | 33           | 48         |
|            | GCA   | 174         | 129          | 123        |
|            | GCT   | 271         | 172          | 228        |
| Cys        | GCC   | 76          | 58           | 63         |
|            | TGT   | 364         | 246          | 321        |
|            | TGC   | 158         | 124          | 135        |
| Asp        | GAT   | 344         | 242          | 249        |
|            | GAC   | 103         | 86           | 108        |
| Glu        | GAG   | 142         | 139          | 140        |
|            | GAA   | 395         | 255          | 319        |
| Phe        | TTT   | 1318        | 1024         | 1168       |
|            | TTC   | 397         | 288          | 327        |
| Gly        | GGG   | 99          | 80           | 91         |
|            | GGA   | 156         | 116          | 156        |
|            | GGT   | 196         | 162          | 198        |
|            | GGC   | 81          | 37           | 58         |
| His        | CAT   | 349         | 226          | 285        |
|            | CAC   | 150         | 100          | 131        |
| Ile        | ATA   | 988         | 678          | 767        |
|            | ATT   | 902         | 684          | 689        |
|            | ATC   | 346         | 245          | 281        |
| Lys        | AAG   | 463         | 318          | 345        |
|            | AAA   | 1266        | 969          | 1087       |
| Leu        | TTG   | 325         | 215          | 295        |
|            | TTA   | 1010        | 740          | 841        |
|            | CTG   | 198         | 145          | 178        |
|            | CTA   | 534         | 408          | 407        |
|            | CTT   | 476         | 337          | 345        |
|            | CTC   | 160         | 128          | 138        |
| Met        | ATG   | 322         | 282          | 290        |
| Asn        | AAT   | 915         | 607          | 642        |
|            | AAC   | 445         | 291          | 307        |
| Pro        | CCG   | 74          | 45           | 49         |

|     |     |      |     |     |
|-----|-----|------|-----|-----|
|     | CCA | 208  | 136 | 148 |
|     | CCT | 268  | 159 | 177 |
|     | CCC | 116  | 66  | 68  |
| Gln | CAG | 192  | 140 | 180 |
|     | CAA | 354  | 256 | 263 |
| Arg | AGG | 169  | 183 | 209 |
|     | AGA | 472  | 327 | 307 |
|     | CGG | 64   | 53  | 50  |
|     | CGA | 93   | 66  | 85  |
|     | CGT | 102  | 79  | 109 |
|     | CGC | 64   | 48  | 35  |
| Ser | AGT | 414  | 275 | 375 |
|     | AGC | 246  | 208 | 208 |
|     | TCG | 72   | 72  | 83  |
|     | TCA | 326  | 189 | 274 |
|     | TCT | 472  | 316 | 363 |
|     | TCC | 198  | 126 | 130 |
| Thr | ACG | 105  | 93  | 76  |
|     | ACA | 372  | 326 | 259 |
|     | ACT | 451  | 273 | 347 |
|     | ACC | 246  | 176 | 175 |
| Val | GTG | 152  | 104 | 123 |
|     | GTA | 449  | 295 | 399 |
|     | GTT | 433  | 307 | 338 |
|     | GTC | 117  | 76  | 111 |
| Trp | TGG | 154  | 137 | 165 |
|     | TGA | 285  | 222 | 226 |
| Tyr | TAT | 958  | 723 | 757 |
|     | TAC | 450  | 351 | 336 |
| End | TAG | 480  | 368 | 407 |
|     | TAA | 1041 | 717 | 812 |

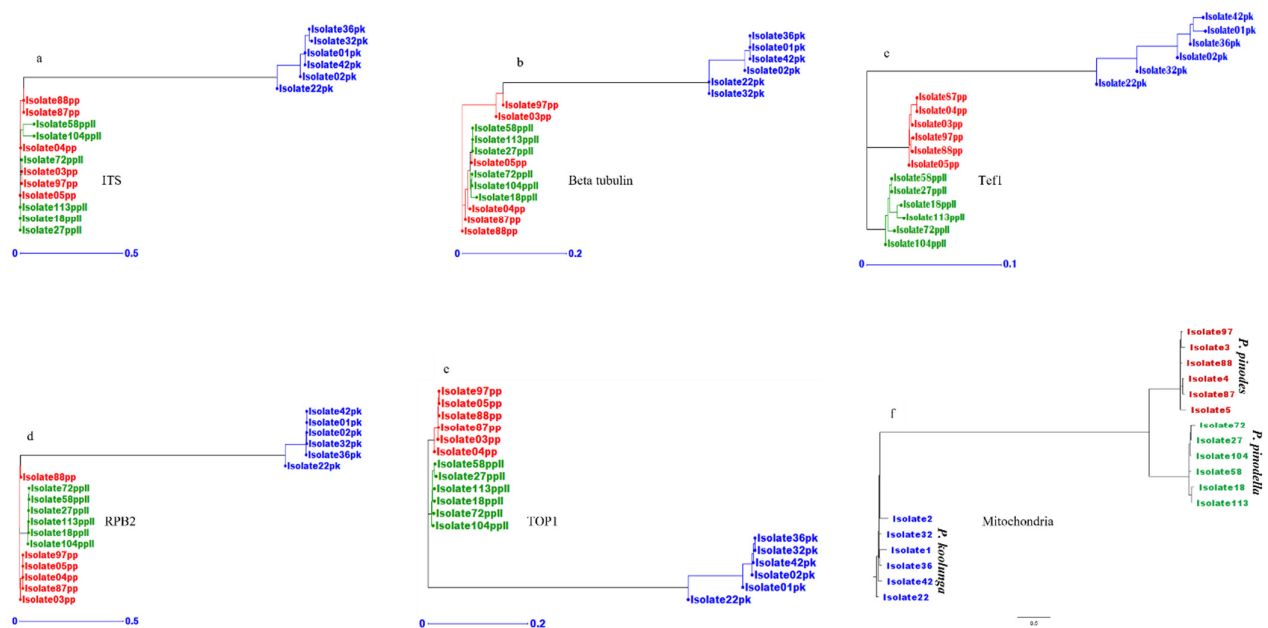

**Supplementary Figure S8.** Fungal barcoding genes: Relationship between AB species using ITS and protein coding genes are displayed (a,b,c,d and e); Parsimony phylogenetic tree of mitochondrial genome of AB species using kSNP and FigTree (f).
